# Supplementary material for: ConsensusDriver Improves upon Individual Algorithms for Predicting Driver Alterations in Different Cancer Types and Individual Patients
Source: Oxford University Press journal article supplement (doi:10.1158/0008-5472.can-17-1345), 2017-12-19
Supplement: 00085472can171345-sup-182915_3_supp_4332780_5xw6v7.xlsx [file 00085472can171345-sup-182915_3_supp_4332780_5xw6v7.xlsx]

## Sheet: PIK3CA_oncogenic_mutation
PIK3CA	E545A
PIK3CA	E545G
PIK3CA	C420R
PIK3CA	G106R
PIK3CA	E545K
PIK3CA	Q546K
PIK3CA	P539R		List of PIK3CA oncogenic mutations obtained from OncoKB (http://oncokb.org/#/)
PIK3CA	P449T
PIK3CA	H1047L
PIK3CA	N345K
PIK3CA	R38H
PIK3CA	Q546E
PIK3CA	D1029Y
PIK3CA	R93Q
PIK3CA	K111E
PIK3CA	E542K
PIK3CA	H1047R
PIK3CA	R88Q
PIK3CA	Q546P
