# Supplementary material for: ConsensusDriver Improves upon Individual Algorithms for Predicting Driver Alterations in Different Cancer Types and Individual Patients
Source: Oxford University Press journal article supplement (doi:10.1158/0008-5472.can-17-1345), 2017-12-19
Supplement: 00085472can171345-sup-182915_3_supp_4332785_gxw6v7.xlsx [file 00085472can171345-sup-182915_3_supp_4332785_gxw6v7.xlsx]

## Sheet: supplementary_table_1
GeneName	CGC 20150626 [53]	CNA census [54]	UniProt oncogenes [55]	Vogelstein et al. SNV drivers [14]	Vogelstein et al. CNA drivers [14]	DISEASES drivers [56]	NCG4 20150504 false positive drivers [57]	Rubio et al. false positive drivers [58]
ABI1	Y	-	-	-	-	-	-	-
ABL1	Y	-	Y	-	-	-	-	-
ABL2	Y	-	-	-	-	-	-	-
ACKR3	Y	-	-	-	-	-	-	-
ACSL3	Y	-	-	-	-	-	-	-
ACSL6	Y	-	-	-	-	-	-	-
ACTN1	-	-	-	-	-	-	-	Y
ACVR1	Y	-	-	-	-	-	-	-
AFF1	Y	-	Y	-	-	-	-	-
AFF3	Y	-	-	-	-	-	-	-
AFF4	Y	-	Y	-	-	-	-	-
AGAP2	-	-	Y	-	-	-	-	-
AGR2	-	-	Y	-	-	-	-	-
AIM2	-	-	Y	-	-	-	-	-
AKAP13	-	-	Y	-	-	-	-	-
AKAP9	Y	-	-	-	-	-	-	-
AKIP1	-	-	Y	-	-	-	-	-
AKT1	Y	-	Y	-	-	-	-	-
AKT2	Y	Y	Y	-	-	-	-	-
AKT3	-	Y	-	-	-	-	-	-
ALDH2	Y	-	-	-	-	-	-	-
ALK	Y	-	Y	-	-	-	-	-
AMER1	Y	-	-	-	-	-	-	-
APC	Y	-	Y	-	-	-	-	-
AR	-	Y	-	-	-	-	-	-
ARAF	-	-	Y	-	-	-	-	-
ARHGAP20	-	-	Y	-	-	-	-	-
ARHGAP26	Y	-	Y	-	-	-	-	-
ARHGAP35	-	-	Y	-	-	-	-	-
ARHGEF12	Y	-	Y	-	-	-	-	-
ARHGEF5	-	-	Y	-	-	-	-	-
ARID1A	Y	-	-	-	-	-	-	-
ARID1B	Y	-	-	-	-	-	-	-
ARID2	Y	-	-	-	-	-	-	-
ARID3B	-	-	Y	-	-	-	-	-
ARNT	Y	-	-	-	-	-	-	-
ARPC1A	-	Y	-	-	-	-	-	-
ASPSCR1	Y	-	Y	-	-	-	-	-
ASXL1	Y	-	-	-	-	-	-	-
ATF1	Y	-	-	-	-	-	-	-
ATIC	Y	-	-	-	-	-	-	-
ATM	Y	-	Y	-	-	-	-	-
ATP1A1	Y	-	-	-	-	-	-	-
ATP2B3	Y	-	-	-	-	-	-	-
ATR	Y	-	-	-	-	-	-	-
ATRX	Y	-	-	-	-	-	-	-
AURKA	-	Y	Y	-	-	-	-	-
AXIN1	Y	-	Y	-	-	-	-	-
AXIN2	Y	-	-	-	-	-	-	-
AXL	-	-	Y	-	-	-	-	-
BAG4	-	Y	-	-	-	-	-	-
BANP	-	-	Y	-	-	-	-	-
BAP1	Y	-	-	-	-	-	-	-
BAX	-	-	Y	-	-	-	-	-
BCAS3	-	-	Y	-	-	-	-	-
BCAS4	-	-	Y	-	-	-	-	-
BCL10	Y	-	Y	-	-	-	-	-
BCL11A	Y	-	-	-	-	-	-	-
BCL11B	Y	-	-	-	-	-	-	-
BCL2	Y	-	Y	-	-	-	-	-
BCL2L2	-	Y	-	-	-	-	-	-
BCL3	Y	-	Y	-	-	-	-	-
BCL5	Y	-	-	-	-	-	-	-
BCL6	Y	-	Y	-	-	-	-	-
BCL7A	Y	-	-	-	-	-	-	-
BCL9	Y	-	Y	-	-	-	-	-
BCOR	Y	-	-	-	-	-	-	-
BCR	Y	-	Y	-	-	-	-	-
BIN1	-	-	Y	-	-	-	-	-
BIRC2	-	Y	-	-	-	-	-	-
BIRC3	Y	-	-	-	-	-	-	-
BLM	Y	-	-	-	-	-	-	-
BMI1	-	-	Y	-	-	-	-	-
BMPR1A	Y	-	-	-	-	-	-	-
BRAF	Y	-	Y	-	-	-	-	-
BRCA1	Y	-	Y	-	-	-	-	-
BRCA2	Y	-	Y	-	-	-	-	-
BRCC3	-	-	Y	-	-	-	-	-
BRD3	Y	-	-	-	-	-	-	-
BRD4	Y	-	-	-	-	-	-	-
BRD7	-	-	Y	-	-	-	-	-
BRI3BP	-	-	Y	-	-	-	-	-
BRIP1	Y	-	-	-	-	-	-	-
BRMS1	-	-	Y	-	-	-	-	-
BTG1	Y	-	Y	-	-	-	-	-
BUB1B	Y	-	Y	-	-	-	-	-
C10orf90	-	-	Y	-	-	-	-	-
C10orf99	-	-	Y	-	-	-	-	-
C11orf30	-	Y	-	-	-	-	-	-
C12orf9	Y	-	-	-	-	-	-	-
C15orf65	Y	-	-	-	-	-	-	-
C2orf44	Y	-	-	-	-	-	-	-
C8orf4	-	Y	-	-	-	-	-	-
CACNA1D	Y	-	-	-	-	-	-	-
CACNA1E	-	Y	-	-	-	-	-	-
CADM1	-	-	Y	-	-	-	-	-
CADM4	-	-	Y	-	-	-	-	-
CALR	Y	-	-	-	-	-	-	-
CAMTA1	Y	-	-	-	-	-	-	-
CANT1	Y	-	-	-	-	-	-	-
CARD11	Y	-	-	-	-	-	-	-
CARS	Y	-	Y	-	-	-	-	-
CASC5	Y	-	-	-	-	-	-	-
CASP8	Y	-	-	-	-	-	-	-
CBFA2T3	Y	-	-	-	-	-	-	-
CBFB	Y	-	Y	-	-	-	-	-
CBL	Y	-	Y	-	-	-	-	-
CBLB	Y	-	-	-	-	-	-	-
CBLC	Y	-	-	-	-	-	-	-
CCAR2	-	-	Y	-	-	-	-	-
CCDC168	-	-	-	-	-	-	Y	-
CCDC6	Y	-	Y	-	-	-	-	-
CCNB1IP1	Y	-	-	-	-	-	-	-
CCND1	Y	Y	Y	-	-	-	-	-
CCND2	Y	Y	-	-	-	-	-	-
CCND3	Y	-	-	-	-	-	-	-
CCNE1	Y	Y	-	-	-	-	-	-
CCNL1	-	-	Y	-	-	-	-	-
CD274	Y	-	-	-	-	-	-	-
CD74	Y	-	-	-	-	-	-	-
CD79A	Y	-	-	-	-	-	-	-
CD79B	Y	-	-	-	-	-	-	-
CDC6	-	Y	-	-	-	-	-	-
CDC73	Y	-	Y	-	-	-	-	-
CDH1	Y	-	-	-	-	-	-	-
CDH11	Y	-	-	-	-	-	-	-
CDK12	Y	-	-	-	-	-	-	-
CDK2AP1	-	-	Y	-	-	-	-	-
CDK4	Y	Y	-	-	-	-	-	-
CDK6	Y	Y	-	-	-	-	-	-
CDKN1B	Y	-	Y	-	-	-	-	-
CDKN1C	-	-	Y	-	-	-	-	-
CDKN2A	Y	-	Y	-	-	-	-	-
CDKN2B	-	-	Y	-	-	-	-	-
CDKN2C	Y	-	-	-	-	-	-	-
CDKN2D	-	-	Y	-	-	-	-	-
CDKN2a(p14)	Y	-	-	-	-	-	-	-
CDT1	-	-	Y	-	-	-	-	-
CDX2	Y	-	-	-	-	-	-	-
CEBPA	Y	-	-	-	-	-	-	-
CEP89	Y	-	-	-	-	-	-	-
CHCHD7	Y	-	-	-	-	-	-	-
CHD1L	-	Y	-	-	-	-	-	-
CHD5	-	-	Y	-	-	-	-	-
CHEK2	Y	-	Y	-	-	-	-	-
CHIC2	Y	-	-	-	-	-	-	-
CHN1	Y	-	-	-	-	-	-	-
CIC	Y	-	-	-	-	-	-	-
CIITA	Y	-	-	-	-	-	-	-
CKS1B	-	Y	-	-	-	-	-	-
CLP1	Y	-	-	-	-	-	-	-
CLTC	Y	-	-	-	-	-	-	-
CLTCL1	Y	-	-	-	-	-	-	-
CMC4	-	-	Y	-	-	-	-	-
CNBP	Y	-	-	-	-	-	-	-
CNOT3	Y	-	-	-	-	-	-	-
CNTN5	-	-	-	-	-	-	Y	-
CNTNAP2	-	-	-	-	-	-	Y	-
CNTRL	Y	-	-	-	-	-	-	-
COL10A1	-	-	-	-	-	-	-	Y
COL11A1	-	-	-	-	-	-	-	Y
COL11A2	-	-	-	-	-	-	-	Y
COL12A1	-	-	-	-	-	-	-	Y
COL13A1	-	-	-	-	-	-	-	Y
COL14A1	-	-	-	-	-	-	-	Y
COL15A1	-	-	-	-	-	-	-	Y
COL16A1	-	-	-	-	-	-	-	Y
COL17A1	-	-	-	-	-	-	-	Y
COL18A1	-	-	-	-	-	-	-	Y
COL18A1-AS1	-	-	-	-	-	-	-	Y
COL19A1	-	-	-	-	-	-	-	Y
COL1A1	Y	-	-	-	-	-	-	-
COL1A2	-	-	-	-	-	-	-	Y
COL20A1	-	-	-	-	-	-	-	Y
COL21A1	-	-	-	-	-	-	-	Y
COL22A1	-	-	-	-	-	-	-	Y
COL23A1	-	-	-	-	-	-	-	Y
COL24A1	-	-	-	-	-	-	-	Y
COL25A1	-	-	-	-	-	-	-	Y
COL26A1	-	-	-	-	-	-	-	Y
COL27A1	-	-	-	-	-	-	-	Y
COL28A1	-	-	-	-	-	-	-	Y
COL29A1	-	-	-	-	-	-	-	Y
COL3A1	-	-	-	-	-	-	-	Y
COL4A1	-	-	-	-	-	-	-	Y
COL4A2	-	-	-	-	-	-	-	Y
COL4A3	-	-	-	-	-	-	-	Y
COL4A3BP	-	-	-	-	-	-	-	Y
COL4A4	-	-	-	-	-	-	-	Y
COL4A5	-	-	-	-	-	-	-	Y
COL4A6	-	-	-	-	-	-	-	Y
COL5A1	-	-	-	-	-	-	-	Y
COL5A2	-	-	-	-	-	-	-	Y
COL5A3	-	-	-	-	-	-	-	Y
COL6A1	-	-	-	-	-	-	-	Y
COL6A2	-	-	-	-	-	-	-	Y
COL6A3	-	-	-	-	-	-	-	Y
COL6A6	-	-	-	-	-	-	-	Y
COL7A1	-	-	-	-	-	-	-	Y
COL8A1	-	-	-	-	-	-	-	Y
COL8A2	-	-	-	-	-	-	-	Y
COL9A1	-	-	-	-	-	-	-	Y
COL9A2	-	-	-	-	-	-	-	Y
COL9A3	-	-	-	-	-	-	-	Y
COPS3	-	Y	-	-	-	-	-	-
COX6C	Y	-	-	-	-	-	-	-
CREB1	Y	-	-	-	-	-	-	-
CREB3L1	Y	-	-	-	-	-	-	-
CREB3L2	Y	-	Y	-	-	-	-	-
CREBBP	Y	-	-	-	-	-	-	-
CREBL2	-	-	Y	-	-	-	-	-
CRK	-	-	Y	-	-	-	-	-
CRLF2	Y	-	-	-	-	-	-	-
CRTC1	Y	-	-	-	-	-	-	-
CRTC3	Y	-	-	-	-	-	-	-
CSF1R	-	-	Y	-	-	-	-	-
CSF3R	Y	-	-	-	-	-	-	-
CSMD1	-	-	-	-	-	-	Y	-
CSMD3	-	-	-	-	-	-	Y	-
CSNK2A3	-	-	Y	-	-	-	-	-
CTCF	-	-	Y	-	-	-	-	-
CTNNA3	-	-	-	-	-	-	Y	-
CTNNB1	Y	-	-	-	-	-	-	-
CUX1	Y	-	-	-	-	-	-	-
CYLD	Y	-	Y	-	-	-	-	-
DAB2	-	-	Y	-	-	-	-	-
DAB2IP	-	-	Y	-	-	-	-	-
DAPK3	-	-	Y	-	-	-	-	-
DAXX	Y	-	-	-	-	-	-	-
DCC	-	-	Y	-	-	-	-	-
DCTN1	Y	-	-	-	-	-	-	-
DCUN1D1	-	Y	Y	-	-	-	-	-
DDB2	Y	-	-	-	-	-	-	-
DDIT3	Y	-	Y	-	-	-	-	-
DDX10	Y	-	-	-	-	-	-	-
DDX5	Y	-	-	-	-	-	-	-
DDX6	Y	-	Y	-	-	-	-	-
2001-12-01	-	-	Y	-	-	-	-	-
DEK	Y	-	Y	-	-	-	-	-
DFNA5	-	-	Y	-	-	-	-	-
DICER1	Y	-	-	-	-	-	-	-
DIS3L2	-	-	Y	-	-	-	-	-
DLC1	-	-	Y	-	-	-	-	-
DLEC1	-	-	Y	-	-	-	-	-
DLEU1	-	-	Y	-	-	-	-	-
DMBT1	-	-	Y	-	-	-	-	-
DMD	-	-	-	-	-	-	-	Y
DMD	-	-	-	-	-	-	Y	-
DMTF1	-	-	Y	-	-	-	-	-
DMTN	-	-	Y	-	-	-	-	-
DNAJC27	-	-	Y	-	-	-	-	-
DNM2	Y	-	-	-	-	-	-	-
DNMT3A	Y	-	-	-	-	-	-	-
DOCK4	-	-	Y	-	-	-	-	-
DPH1	-	-	Y	-	-	-	-	-
DUX4L1	Y	-	-	-	-	-	-	-
DYRK2	-	Y	-	-	-	-	-	-
E2F3	-	Y	-	-	-	-	-	-
EBF1	Y	-	-	-	-	-	-	-
ECT2	-	-	Y	-	-	-	-	-
ECT2L	Y	-	-	-	-	-	-	-
EEF1A2	-	Y	-	-	-	-	-	-
EFNA1	-	-	Y	-	-	-	-	-
EGFR	Y	Y	Y	-	-	-	-	-
EIF3E	Y	-	-	-	-	-	-	-
EIF4A2	Y	-	-	-	-	-	-	-
EIF5A2	-	Y	-	-	-	-	-	-
ELAC2	-	-	Y	-	-	-	-	-
ELF4	Y	-	Y	-	-	-	-	-
ELK4	Y	-	-	-	-	-	-	-
ELL	Y	-	Y	-	-	-	-	-
ELN	Y	-	-	-	-	-	-	-
EML4	Y	-	-	-	-	-	-	-
ENSP00000011653	-	-	-	-	-	Y	-	-
ENSP00000013034	-	-	-	-	-	Y	-	-
ENSP00000013807	-	-	-	-	-	Y	-	-
ENSP00000020945	-	-	-	-	-	Y	-	-
ENSP00000085219	-	-	-	-	-	Y	-	-
ENSP00000167586	-	-	-	-	-	Y	-	-
ENSP00000167588	-	-	-	-	-	Y	-	-
ENSP00000211122	-	-	-	-	-	Y	-	-
ENSP00000215832	-	-	-	-	-	Y	-	-
ENSP00000216341	-	-	-	-	-	Y	-	-
ENSP00000216492	-	-	-	-	-	Y	-	-
ENSP00000216797	-	-	-	-	-	Y	-	-
ENSP00000216911	-	-	-	-	-	Y	-	-
ENSP00000218388	-	-	-	-	-	Y	-	-
ENSP00000219070	-	-	-	-	-	Y	-	-
ENSP00000220616	-	-	-	-	-	Y	-	-
ENSP00000221132	-	-	-	-	-	Y	-	-
ENSP00000221930	-	-	-	-	-	Y	-	-
ENSP00000221972	-	-	-	-	-	Y	-	-
ENSP00000222390	-	-	-	-	-	Y	-	-
ENSP00000223095	-	-	-	-	-	Y	-	-
ENSP00000225474	-	-	-	-	-	Y	-	-
ENSP00000225577	-	-	-	-	-	Y	-	-
ENSP00000225740	-	-	-	-	-	Y	-	-
ENSP00000226279	-	-	-	-	-	Y	-	-
ENSP00000226730	-	-	-	-	-	Y	-	-
ENSP00000227507	-	-	-	-	-	Y	-	-
ENSP00000227758	-	-	-	-	-	Y	-	-
ENSP00000228280	-	-	-	-	-	Y	-	-
ENSP00000228682	-	-	-	-	-	Y	-	-
ENSP00000228872	-	-	-	-	-	Y	-	-
ENSP00000229135	-	-	-	-	-	Y	-	-
ENSP00000229239	-	-	-	-	-	Y	-	-
ENSP00000229277	-	-	-	-	-	Y	-	-
ENSP00000229307	-	-	-	-	-	Y	-	-
ENSP00000231449	-	-	-	-	-	Y	-	-
ENSP00000231572	-	-	-	-	-	Y	-	-
ENSP00000231656	-	-	-	-	-	Y	-	-
ENSP00000231790	-	-	-	-	-	Y	-	-
ENSP00000233146	-	-	-	-	-	Y	-	-
ENSP00000234111	-	-	-	-	-	Y	-	-
ENSP00000234420	-	-	-	-	-	Y	-	-
ENSP00000236671	-	-	-	-	-	Y	-	-
ENSP00000237612	-	-	-	-	-	Y	-	-
ENSP00000239938	-	-	-	-	-	Y	-	-
ENSP00000241052	-	-	-	-	-	Y	-	-
ENSP00000241261	-	-	-	-	-	Y	-	-
ENSP00000241453	-	-	-	-	-	Y	-	-
ENSP00000244050	-	-	-	-	-	Y	-	-
ENSP00000244741	-	-	-	-	-	Y	-	-
ENSP00000248553	-	-	-	-	-	Y	-	-
ENSP00000248935	-	-	-	-	-	Y	-	-
ENSP00000250092	-	-	-	-	-	Y	-	-
ENSP00000251849	-	-	-	-	-	Y	-	-
ENSP00000252029	-	-	-	-	-	Y	-	-
ENSP00000252242	-	-	-	-	-	Y	-	-
ENSP00000252723	-	-	-	-	-	Y	-	-
ENSP00000254066	-	-	-	-	-	Y	-	-
ENSP00000254301	-	-	-	-	-	Y	-	-
ENSP00000254351	-	-	-	-	-	Y	-	-
ENSP00000254810	-	-	-	-	-	Y	-	-
ENSP00000255030	-	-	-	-	-	Y	-	-
ENSP00000256078	-	-	-	-	-	Y	-	-
ENSP00000256442	-	-	-	-	-	Y	-	-
ENSP00000256509	-	-	-	-	-	Y	-	-
ENSP00000256857	-	-	-	-	-	Y	-	-
ENSP00000257290	-	-	-	-	-	Y	-	-
ENSP00000257904	-	-	-	-	-	Y	-	-
ENSP00000258743	-	-	-	-	-	Y	-	-
ENSP00000260227	-	-	-	-	-	Y	-	-
ENSP00000260356	-	-	-	-	-	Y	-	-
ENSP00000260630	-	-	-	-	-	Y	-	-
ENSP00000260970	-	-	-	-	-	Y	-	-
ENSP00000260985	-	-	-	-	-	Y	-	-
ENSP00000261254	-	-	-	-	-	Y	-	-
ENSP00000261537	-	-	-	-	-	Y	-	-
ENSP00000261769	-	-	-	-	-	Y	-	-
ENSP00000261799	-	-	-	-	-	Y	-	-
ENSP00000261937	-	-	-	-	-	Y	-	-
ENSP00000262160	-	-	-	-	-	Y	-	-
ENSP00000262262	-	-	-	-	-	Y	-	-
ENSP00000262768	-	-	-	-	-	Y	-	-
ENSP00000262887	-	-	-	-	-	Y	-	-
ENSP00000263025	-	-	-	-	-	Y	-	-
ENSP00000263233	-	-	-	-	-	Y	-	-
ENSP00000263253	-	-	-	-	-	Y	-	-
ENSP00000263341	-	-	-	-	-	Y	-	-
ENSP00000263431	-	-	-	-	-	Y	-	-
ENSP00000263464	-	-	-	-	-	Y	-	-
ENSP00000263735	-	-	-	-	-	Y	-	-
ENSP00000263923	-	-	-	-	-	Y	-	-
ENSP00000263967	-	-	-	-	-	Y	-	-
ENSP00000264246	-	-	-	-	-	Y	-	-
ENSP00000264498	-	-	-	-	-	Y	-	-
ENSP00000264657	-	-	-	-	-	Y	-	-
ENSP00000264708	-	-	-	-	-	Y	-	-
ENSP00000264709	-	-	-	-	-	Y	-	-
ENSP00000264832	-	-	-	-	-	Y	-	-
ENSP00000265171	-	-	-	-	-	Y	-	-
ENSP00000265724	-	-	-	-	-	Y	-	-
ENSP00000265734	-	-	-	-	-	Y	-	-
ENSP00000265849	-	-	-	-	-	Y	-	-
ENSP00000266970	-	-	-	-	-	Y	-	-
ENSP00000267101	-	-	-	-	-	Y	-	-
ENSP00000267163	-	-	-	-	-	Y	-	-
ENSP00000268035	-	-	-	-	-	Y	-	-
ENSP00000268296	-	-	-	-	-	Y	-	-
ENSP00000269141	-	-	-	-	-	Y	-	-
ENSP00000269305	-	-	-	-	-	Y	-	-
ENSP00000269571	-	-	-	-	-	Y	-	-
ENSP00000270202	-	-	-	-	-	Y	-	-
ENSP00000274255	-	-	-	-	-	Y	-	-
ENSP00000275493	-	-	-	-	-	Y	-	-
ENSP00000276431	-	-	-	-	-	Y	-	-
ENSP00000276925	-	-	-	-	-	Y	-	-
ENSP00000276927	-	-	-	-	-	Y	-	-
ENSP00000277541	-	-	-	-	-	Y	-	-
ENSP00000278616	-	-	-	-	-	Y	-	-
ENSP00000280193	-	-	-	-	-	Y	-	-
ENSP00000281043	-	-	-	-	-	Y	-	-
ENSP00000282091	-	-	-	-	-	Y	-	-
ENSP00000282397	-	-	-	-	-	Y	-	-
ENSP00000283635	-	-	-	-	-	Y	-	-
ENSP00000284240	-	-	-	-	-	Y	-	-
ENSP00000285238	-	-	-	-	-	Y	-	-
ENSP00000287641	-	-	-	-	-	Y	-	-
ENSP00000287820	-	-	-	-	-	Y	-	-
ENSP00000288135	-	-	-	-	-	Y	-	-
ENSP00000289153	-	-	-	-	-	Y	-	-
ENSP00000293288	-	-	-	-	-	Y	-	-
ENSP00000293308	-	-	-	-	-	Y	-	-
ENSP00000293328	-	-	-	-	-	Y	-	-
ENSP00000294489	-	-	-	-	-	Y	-	-
ENSP00000295256	-	-	-	-	-	Y	-	-
ENSP00000295453	-	-	-	-	-	Y	-	-
ENSP00000295897	-	-	-	-	-	Y	-	-
ENSP00000296511	-	-	-	-	-	Y	-	-
ENSP00000296545	-	-	-	-	-	Y	-	-
ENSP00000296870	-	-	-	-	-	Y	-	-
ENSP00000296871	-	-	-	-	-	Y	-	-
ENSP00000296930	-	-	-	-	-	Y	-	-
ENSP00000297261	-	-	-	-	-	Y	-	-
ENSP00000297785	-	-	-	-	-	Y	-	-
ENSP00000300060	-	-	-	-	-	Y	-	-
ENSP00000300093	-	-	-	-	-	Y	-	-
ENSP00000300305	-	-	-	-	-	Y	-	-
ENSP00000302111	-	-	-	-	-	Y	-	-
ENSP00000302486	-	-	-	-	-	Y	-	-
ENSP00000302564	-	-	-	-	-	Y	-	-
ENSP00000302665	-	-	-	-	-	Y	-	-
ENSP00000302961	-	-	-	-	-	Y	-	-
ENSP00000303394	-	-	-	-	-	Y	-	-
ENSP00000303507	-	-	-	-	-	Y	-	-
ENSP00000303939	-	-	-	-	-	Y	-	-
ENSP00000304283	-	-	-	-	-	Y	-	-
ENSP00000304447	-	-	-	-	-	Y	-	-
ENSP00000306245	-	-	-	-	-	Y	-	-
ENSP00000306512	-	-	-	-	-	Y	-	-
ENSP00000306561	-	-	-	-	-	Y	-	-
ENSP00000307235	-	-	-	-	-	Y	-	-
ENSP00000307786	-	-	-	-	-	Y	-	-
ENSP00000308208	-	-	-	-	-	Y	-	-
ENSP00000308541	-	-	-	-	-	Y	-	-
ENSP00000308938	-	-	-	-	-	Y	-	-
ENSP00000309572	-	-	-	-	-	Y	-	-
ENSP00000309845	-	-	-	-	-	Y	-	-
ENSP00000310036	-	-	-	-	-	Y	-	-
ENSP00000311032	-	-	-	-	-	Y	-	-
ENSP00000311469	-	-	-	-	-	Y	-	-
ENSP00000312027	-	-	-	-	-	Y	-	-
ENSP00000312455	-	-	-	-	-	Y	-	-
ENSP00000312987	-	-	-	-	-	Y	-	-
ENSP00000314458	-	-	-	-	-	Y	-	-
ENSP00000315644	-	-	-	-	-	Y	-	-
ENSP00000317272	-	-	-	-	-	Y	-	-
ENSP00000318472	-	-	-	-	-	Y	-	-
ENSP00000319788	-	-	-	-	-	Y	-	-
ENSP00000320147	-	-	-	-	-	Y	-	-
ENSP00000322421	-	-	-	-	-	Y	-	-
ENSP00000322788	-	-	-	-	-	Y	-	-
ENSP00000323280	-	-	-	-	-	Y	-	-
ENSP00000323588	-	-	-	-	-	Y	-	-
ENSP00000324173	-	-	-	-	-	Y	-	-
ENSP00000324856	-	-	-	-	-	Y	-	-
ENSP00000326119	-	-	-	-	-	Y	-	-
ENSP00000328547	-	-	-	-	-	Y	-	-
ENSP00000328973	-	-	-	-	-	Y	-	-
ENSP00000329243	-	-	-	-	-	Y	-	-
ENSP00000329623	-	-	-	-	-	Y	-	-
ENSP00000330382	-	-	-	-	-	Y	-	-
ENSP00000331327	-	-	-	-	-	Y	-	-
ENSP00000331358	-	-	-	-	-	Y	-	-
ENSP00000331746	-	-	-	-	-	Y	-	-
ENSP00000332049	-	-	-	-	-	Y	-	-
ENSP00000332353	-	-	-	-	-	Y	-	-
ENSP00000332602	-	-	-	-	-	Y	-	-
ENSP00000333769	-	-	-	-	-	Y	-	-
ENSP00000334145	-	-	-	-	-	Y	-	-
ENSP00000335153	-	-	-	-	-	Y	-	-
ENSP00000335620	-	-	-	-	-	Y	-	-
ENSP00000337915	-	-	-	-	-	Y	-	-
ENSP00000338018	-	-	-	-	-	Y	-	-
ENSP00000338548	-	-	-	-	-	Y	-	-
ENSP00000338606	-	-	-	-	-	Y	-	-
ENSP00000339191	-	-	-	-	-	Y	-	-
ENSP00000339328	-	-	-	-	-	Y	-	-
ENSP00000339527	-	-	-	-	-	Y	-	-
ENSP00000339824	-	-	-	-	-	Y	-	-
ENSP00000340691	-	-	-	-	-	Y	-	-
ENSP00000341189	-	-	-	-	-	Y	-	-
ENSP00000341208	-	-	-	-	-	Y	-	-
ENSP00000341551	-	-	-	-	-	Y	-	-
ENSP00000342070	-	-	-	-	-	Y	-	-
ENSP00000342087	-	-	-	-	-	Y	-	-
ENSP00000342235	-	-	-	-	-	Y	-	-
ENSP00000342681	-	-	-	-	-	Y	-	-
ENSP00000343392	-	-	-	-	-	Y	-	-
ENSP00000343477	-	-	-	-	-	Y	-	-
ENSP00000343925	-	-	-	-	-	Y	-	-
ENSP00000344456	-	-	-	-	-	Y	-	-
ENSP00000345774	-	-	-	-	-	Y	-	-
ENSP00000346032	-	-	-	-	-	Y	-	-
ENSP00000346839	-	-	-	-	-	Y	-	-
ENSP00000346879	-	-	-	-	-	Y	-	-
ENSP00000347665	-	-	-	-	-	Y	-	-
ENSP00000347858	-	-	-	-	-	Y	-	-
ENSP00000347942	-	-	-	-	-	Y	-	-
ENSP00000347979	-	-	-	-	-	Y	-	-
ENSP00000348068	-	-	-	-	-	Y	-	-
ENSP00000348461	-	-	-	-	-	Y	-	-
ENSP00000349547	-	-	-	-	-	Y	-	-
ENSP00000349960	-	-	-	-	-	Y	-	-
ENSP00000350052	-	-	-	-	-	Y	-	-
ENSP00000350941	-	-	-	-	-	Y	-	-
ENSP00000351015	-	-	-	-	-	Y	-	-
ENSP00000351273	-	-	-	-	-	Y	-	-
ENSP00000351602	-	-	-	-	-	Y	-	-
ENSP00000352121	-	-	-	-	-	Y	-	-
ENSP00000352516	-	-	-	-	-	Y	-	-
ENSP00000353224	-	-	-	-	-	Y	-	-
ENSP00000353483	-	-	-	-	-	Y	-	-
ENSP00000353679	-	-	-	-	-	Y	-	-
ENSP00000354394	-	-	-	-	-	Y	-	-
ENSP00000354487	-	-	-	-	-	Y	-	-
ENSP00000354522	-	-	-	-	-	Y	-	-
ENSP00000354558	-	-	-	-	-	Y	-	-
ENSP00000355124	-	-	-	-	-	Y	-	-
ENSP00000355231	-	-	-	-	-	Y	-	-
ENSP00000355759	-	-	-	-	-	Y	-	-
ENSP00000355778	-	-	-	-	-	Y	-	-
ENSP00000356346	-	-	-	-	-	Y	-	-
ENSP00000356438	-	-	-	-	-	Y	-	-
ENSP00000356694	-	-	-	-	-	Y	-	-
ENSP00000357153	-	-	-	-	-	Y	-	-
ENSP00000357206	-	-	-	-	-	Y	-	-
ENSP00000357380	-	-	-	-	-	Y	-	-
ENSP00000357643	-	-	-	-	-	Y	-	-
ENSP00000357721	-	-	-	-	-	Y	-	-
ENSP00000358022	-	-	-	-	-	Y	-	-
ENSP00000358490	-	-	-	-	-	Y	-	-
ENSP00000358548	-	-	-	-	-	Y	-	-
ENSP00000359301	-	-	-	-	-	Y	-	-
ENSP00000359663	-	-	-	-	-	Y	-	-
ENSP00000359998	-	-	-	-	-	Y	-	-
ENSP00000360216	-	-	-	-	-	Y	-	-
ENSP00000360266	-	-	-	-	-	Y	-	-
ENSP00000361021	-	-	-	-	-	Y	-	-
ENSP00000361125	-	-	-	-	-	Y	-	-
ENSP00000361359	-	-	-	-	-	Y	-	-
ENSP00000361405	-	-	-	-	-	Y	-	-
ENSP00000361423	-	-	-	-	-	Y	-	-
ENSP00000361850	-	-	-	-	-	Y	-	-
ENSP00000362082	-	-	-	-	-	Y	-	-
ENSP00000362649	-	-	-	-	-	Y	-	-
ENSP00000363089	-	-	-	-	-	Y	-	-
ENSP00000363965	-	-	-	-	-	Y	-	-
ENSP00000364310	-	-	-	-	-	Y	-	-
ENSP00000365380	-	-	-	-	-	Y	-	-
ENSP00000365775	-	-	-	-	-	Y	-	-
ENSP00000365851	-	-	-	-	-	Y	-	-
ENSP00000366005	-	-	-	-	-	Y	-	-
ENSP00000366563	-	-	-	-	-	Y	-	-
ENSP00000367207	-	-	-	-	-	Y	-	-
ENSP00000367608	-	-	-	-	-	Y	-	-
ENSP00000368667	-	-	-	-	-	Y	-	-
ENSP00000368880	-	-	-	-	-	Y	-	-
ENSP00000369050	-	-	-	-	-	Y	-	-
ENSP00000369351	-	-	-	-	-	Y	-	-
ENSP00000369554	-	-	-	-	-	Y	-	-
ENSP00000370408	-	-	-	-	-	Y	-	-
ENSP00000370473	-	-	-	-	-	Y	-	-
ENSP00000370588	-	-	-	-	-	Y	-	-
ENSP00000370839	-	-	-	-	-	Y	-	-
ENSP00000370989	-	-	-	-	-	Y	-	-
ENSP00000371067	-	-	-	-	-	Y	-	-
ENSP00000372023	-	-	-	-	-	Y	-	-
ENSP00000372088	-	-	-	-	-	Y	-	-
ENSP00000372221	-	-	-	-	-	Y	-	-
ENSP00000373700	-	-	-	-	-	Y	-	-
ENSP00000375809	-	-	-	-	-	Y	-	-
ENSP00000375881	-	-	-	-	-	Y	-	-
ENSP00000376889	-	-	-	-	-	Y	-	-
ENSP00000376943	-	-	-	-	-	Y	-	-
ENSP00000378517	-	-	-	-	-	Y	-	-
ENSP00000378699	-	-	-	-	-	Y	-	-
ENSP00000379138	-	-	-	-	-	Y	-	-
ENSP00000379140	-	-	-	-	-	Y	-	-
ENSP00000379213	-	-	-	-	-	Y	-	-
ENSP00000379658	-	-	-	-	-	Y	-	-
ENSP00000381607	-	-	-	-	-	Y	-	-
ENSP00000382342	-	-	-	-	-	Y	-	-
ENSP00000385834	-	-	-	-	-	Y	-	-
ENSP00000386884	-	-	-	-	-	Y	-	-
ENSP00000387699	-	-	-	-	-	Y	-	-
ENSP00000388648	-	-	-	-	-	Y	-	-
ENSP00000390600	-	-	-	-	-	Y	-	-
ENSP00000391676	-	-	-	-	-	Y	-	-
ENSP00000391826	-	-	-	-	-	Y	-	-
ENSP00000393312	-	-	-	-	-	Y	-	-
ENSP00000394932	-	-	-	-	-	Y	-	-
ENSP00000396259	-	-	-	-	-	Y	-	-
ENSP00000398495	-	-	-	-	-	Y	-	-
ENSP00000398632	-	-	-	-	-	Y	-	-
ENSP00000398698	-	-	-	-	-	Y	-	-
ENSP00000399168	-	-	-	-	-	Y	-	-
ENSP00000400142	-	-	-	-	-	Y	-	-
ENSP00000400175	-	-	-	-	-	Y	-	-
ENSP00000407375	-	-	-	-	-	Y	-	-
ENSP00000408695	-	-	-	-	-	Y	-	-
ENSP00000410294	-	-	-	-	-	Y	-	-
ENSP00000411532	-	-	-	-	-	Y	-	-
ENSP00000412237	-	-	-	-	-	Y	-	-
ENSP00000415183	-	-	-	-	-	Y	-	-
ENSP00000415481	-	-	-	-	-	Y	-	-
ENSP00000416293	-	-	-	-	-	Y	-	-
ENSP00000416330	-	-	-	-	-	Y	-	-
ENSP00000417281	-	-	-	-	-	Y	-	-
ENSP00000418960	-	-	-	-	-	Y	-	-
ENSP00000420168	-	-	-	-	-	Y	-	-
ENSP00000425561	-	-	-	-	-	Y	-	-
ENSP00000427514	-	-	-	-	-	Y	-	-
ENSP00000437940	-	-	-	-	-	Y	-	-
ENSP00000441410	-	-	-	-	-	Y	-	-
ENSP00000441691	-	-	-	-	-	Y	-	-
ENSP00000447173	-	-	-	-	-	Y	-	-
ENSP00000451560	-	-	-	-	-	Y	-	-
ENSP00000452780	-	-	-	-	-	Y	-	-
ENSP00000457230	-	-	-	-	-	Y	-	-
ENSP00000457706	-	-	-	-	-	Y	-	-
ENSP00000463999	-	-	-	-	-	Y	-	-
ENTPD5	-	-	Y	-	-	-	-	-
EP300	Y	-	-	-	-	-	-	-
EPB41L3	-	-	Y	-	-	-	-	-
EPHB2	-	-	Y	-	-	-	-	-
EPS15	Y	-	Y	-	-	-	-	-
ERBB2	Y	Y	-	-	-	-	-	-
ERBB3	Y	-	-	-	-	-	-	-
ERC1	Y	-	-	-	-	-	-	-
ERCC2	Y	-	-	-	-	-	-	-
ERCC3	Y	-	-	-	-	-	-	-
ERCC4	Y	-	-	-	-	-	-	-
ERCC5	Y	-	-	-	-	-	-	-
ERG	Y	-	Y	-	-	-	-	-
ERRFI1	-	-	Y	-	-	-	-	-
ESR1	Y	-	-	-	-	-	-	-
ETNK1	Y	-	-	-	-	-	-	-
ETS1	-	-	Y	-	-	-	-	-
ETS2	-	-	Y	-	-	-	-	-
ETV1	Y	Y	Y	-	-	-	-	-
ETV4	Y	-	-	-	-	-	-	-
ETV5	Y	-	-	-	-	-	-	-
ETV6	Y	-	Y	-	-	-	-	-
EVI2A	-	-	Y	-	-	-	-	-
EVI2B	-	-	Y	-	-	-	-	-
EWSR1	Y	-	Y	-	-	-	-	-
EXT1	Y	-	Y	-	-	-	-	-
EXT2	Y	-	Y	-	-	-	-	-
EYS	-	-	-	-	-	-	Y	-
EZH2	Y	-	-	-	-	-	-	-
EZR	Y	-	-	-	-	-	-	-
FADD	-	Y	-	-	-	-	-	-
FAM120A	-	-	Y	-	-	-	-	-
FAM131B	Y	-	-	-	-	-	-	-
FAM3C	-	-	Y	-	-	-	-	-
FAM46C	Y	-	-	-	-	-	-	-
FANCA	Y	-	-	-	-	-	-	-
FANCC	Y	-	-	-	-	-	-	-
FANCD2	Y	-	-	-	-	-	-	-
FANCE	Y	-	-	-	-	-	-	-
FANCF	Y	-	-	-	-	-	-	-
FANCG	Y	-	-	-	-	-	-	-
FAS	Y	-	-	-	-	-	-	-
FBN2	-	-	-	-	-	-	-	Y
FBXO11	Y	-	-	-	-	-	-	-
FBXW7	Y	-	-	-	-	-	-	-
FCGR2B	Y	-	Y	-	-	-	-	-
FCRL4	Y	-	-	-	-	-	-	-
FER	-	-	Y	-	-	-	-	-
FES	-	-	Y	-	-	-	-	-
FEV	Y	-	-	-	-	-	-	-
FGF3	-	-	Y	-	-	-	-	-
FGF4	-	-	Y	-	-	-	-	-
FGF5	-	-	Y	-	-	-	-	-
FGF6	-	-	Y	-	-	-	-	-
FGFR1	Y	Y	-	-	-	-	-	-
FGFR1OP	Y	-	-	-	-	-	-	-
FGFR2	Y	-	Y	-	-	-	-	-
FGFR3	Y	-	-	-	-	-	-	-
FGFR4	Y	-	-	-	-	-	-	-
FGR	-	-	Y	-	-	-	-	-
FH	Y	-	Y	-	-	-	-	-
FHIT	Y	-	Y	-	-	-	-	-
FIP1L1	Y	-	-	-	-	-	-	-
FLCN	Y	-	Y	-	-	-	-	-
FLI1	Y	-	Y	-	-	-	-	-
FLT3	Y	-	Y	-	-	-	-	-
FNBP1	Y	-	-	-	-	-	-	-
FOS	-	-	Y	-	-	-	-	-
FOXA1	Y	-	-	-	-	-	-	-
FOXL2	Y	-	-	-	-	-	-	-
FOXO1	Y	-	Y	-	-	-	-	-
FOXO3	Y	-	Y	-	-	-	-	-
FOXO4	Y	-	Y	-	-	-	-	-
FOXP1	Y	-	-	-	-	-	-	-
FRAT1	-	-	Y	-	-	-	-	-
FRK	-	-	Y	-	-	-	-	-
FSIP2	-	-	-	-	-	-	Y	-
FSTL3	Y	-	Y	-	-	-	-	-
FUBP1	Y	-	-	-	-	-	-	-
FUS	Y	-	Y	-	-	-	-	-
FYN	-	-	Y	-	-	-	-	-
GAS7	Y	-	Y	-	-	-	-	-
GATA1	Y	-	-	-	-	-	-	-
GATA2	Y	-	-	-	-	-	-	-
GATA3	Y	-	-	-	-	-	-	-
GATA6	-	Y	-	-	-	-	-	-
GFI1B	-	-	Y	-	-	-	-	-
GLI1	-	-	Y	-	-	-	-	-
GMPS	Y	-	Y	-	-	-	-	-
GNA11	Y	-	-	-	-	-	-	-
GNAQ	Y	-	-	-	-	-	-	-
GNAS	Y	-	Y	-	-	-	-	-
GOLGA1	-	-	-	-	-	-	-	Y
GOLGA2	-	-	-	-	-	-	-	Y
GOLGA3	-	-	-	-	-	-	-	Y
GOLGA4	-	-	-	-	-	-	-	Y
GOLGA5	Y	-	-	-	-	-	-	-
GOLGA6A	-	-	-	-	-	-	-	Y
GOLGA6B	-	-	-	-	-	-	-	Y
GOLGA6C	-	-	-	-	-	-	-	Y
GOLGA6D	-	-	-	-	-	-	-	Y
GOLGA6L1	-	-	-	-	-	-	-	Y
GOLGA6L10	-	-	-	-	-	-	-	Y
GOLGA6L2	-	-	-	-	-	-	-	Y
GOLGA6L3	-	-	-	-	-	-	-	Y
GOLGA6L5	-	-	-	-	-	-	-	Y
GOLGA6L6	-	-	-	-	-	-	-	Y
GOLGA6L9	-	-	-	-	-	-	-	Y
GOLGA7	-	-	-	-	-	-	-	Y
GOLGA7B	-	-	-	-	-	-	-	Y
GOLGA8A	-	-	-	-	-	-	-	Y
GOLGA8B	-	-	-	-	-	-	-	Y
GOLGA8F	-	-	-	-	-	-	-	Y
GOLGA8G	-	-	-	-	-	-	-	Y
GOLGA8H	-	-	-	-	-	-	-	Y
GOLGA8I	-	-	-	-	-	-	-	Y
GOLGA8J	-	-	-	-	-	-	-	Y
GOLGA8K	-	-	-	-	-	-	-	Y
GOLGA8M	-	-	-	-	-	-	-	Y
GOLGA8N	-	-	-	-	-	-	-	Y
GOLGA8O	-	-	-	-	-	-	-	Y
GOLGA8Q	-	-	-	-	-	-	-	Y
GOLGA8R	-	-	-	-	-	-	-	Y
GOLGA8S	-	-	-	-	-	-	-	Y
GOLGA8T	-	-	-	-	-	-	-	Y
GOPC	Y	-	-	-	-	-	-	-
GPC3	Y	-	-	-	-	-	-	-
GPC5	-	Y	-	-	-	-	-	-
GPHN	Y	-	-	-	-	-	-	-
GPR68	-	-	Y	-	-	-	-	-
GRB7	-	Y	-	-	-	-	-	-
GRIN2A	Y	-	-	-	-	-	-	-
Gene	-	-	Y	-	-	-	-	-
H3F3A	Y	-	-	-	-	-	-	-
H3F3B	Y	-	-	-	-	-	-	-
HCK	-	-	Y	-	-	-	-	-
HERPUD1	Y	-	-	-	-	-	-	-
HEY1	Y	-	-	-	-	-	-	-
HIC1	-	-	Y	-	-	-	-	-
HIF3A	-	-	Y	-	-	-	-	-
HIP1	Y	-	-	-	-	-	-	-
HIST1H3B	Y	-	-	-	-	-	-	-
HIST1H4I	Y	-	-	-	-	-	-	-
HLA-A	Y	-	-	-	-	-	-	-
HLF	Y	-	Y	-	-	-	-	-
HMGA1	Y	-	-	-	-	-	-	-
HMGA2	Y	-	Y	-	-	-	-	-
HMGN2P46	Y	-	-	-	-	-	-	-
HNF1A	Y	-	-	-	-	-	-	-
HNRNPA2B1	Y	-	-	-	-	-	-	-
HOOK3	Y	-	-	-	-	-	-	-
HOPX	-	-	Y	-	-	-	-	-
HOXA11	Y	-	-	-	-	-	-	-
HOXA13	Y	-	-	-	-	-	-	-
HOXA9	Y	-	Y	-	-	-	-	-
HOXC11	Y	-	-	-	-	-	-	-
HOXC13	Y	-	-	-	-	-	-	-
HOXD11	Y	-	-	-	-	-	-	-
HOXD13	Y	-	-	-	-	-	-	-
HPGD	-	-	Y	-	-	-	-	-
HRAS	Y	-	Y	-	-	-	-	-
HSP90AA1	Y	-	-	-	-	-	-	-
HSP90AB1	Y	-	-	-	-	-	-	-
HTATIP2	-	-	Y	-	-	-	-	-
IDH1	Y	-	-	-	-	-	-	-
IDH2	Y	-	-	-	-	-	-	-
IGH	Y	-	-	-	-	-	-	-
IGK	Y	-	-	-	-	-	-	-
IGL	Y	-	-	-	-	-	-	-
IKBKB	Y	-	-	-	-	-	-	-
IKZF1	Y	-	-	-	-	-	-	-
IL2	Y	-	Y	-	-	-	-	-
IL21R	Y	-	-	-	-	-	-	-
IL6ST	Y	-	-	-	-	-	-	-
IL7R	Y	-	-	-	-	-	-	-
ING1	-	-	Y	-	-	-	-	-
ING4	-	-	Y	-	-	-	-	-
IRF1	-	-	Y	-	-	-	-	-
IRF4	Y	-	-	-	-	-	-	-
IST1	-	Y	-	-	-	-	-	-
ITK	Y	-	-	-	-	-	-	-
JAK1	Y	-	-	-	-	-	-	-
JAK2	Y	-	Y	-	-	-	-	-
JAK3	Y	-	-	-	-	-	-	-
JAZF1	Y	-	Y	-	-	-	-	-
JUN	Y	Y	Y	-	-	-	-	-
KANK1	-	-	Y	-	-	-	-	-
KAT6A	Y	-	Y	-	-	-	-	-
KAT6B	Y	-	-	-	-	-	-	-
KCNJ5	Y	-	-	-	-	-	-	-
KCTD11	-	-	Y	-	-	-	-	-
KDM5A	Y	-	-	-	-	-	-	-
KDM5C	Y	-	-	-	-	-	-	-
KDM6A	Y	-	-	-	-	-	-	-
KDR	Y	-	-	-	-	-	-	-
KDSR	Y	-	Y	-	-	-	-	-
KIAA1549	Y	-	-	-	-	-	-	-
KIAA1598	Y	-	-	-	-	-	-	-
KIF5B	Y	-	-	-	-	-	-	-
KIT	Y	Y	Y	-	-	-	-	-
KLF4	Y	-	-	-	-	-	-	-
KLF6	Y	-	-	-	-	-	-	-
KLK10	-	-	Y	-	-	-	-	-
KLK2	Y	-	-	-	-	-	-	-
KMT2A	Y	-	Y	-	-	-	-	-
KMT2C	Y	-	-	-	-	-	-	-
KMT2D	Y	-	-	-	-	-	-	-
KRAS	Y	Y	Y	-	-	-	-	-
KTN1	Y	-	-	-	-	-	-	-
LASP1	Y	-	-	-	-	-	-	-
LATS1	-	-	Y	-	-	-	-	-
LATS2	-	-	Y	-	-	-	-	-
LCK	Y	-	Y	-	-	-	-	-
LCP1	Y	-	-	-	-	-	-	-
LETMD1	-	-	Y	-	-	-	-	-
LGR6	-	-	Y	-	-	-	-	-
LHFP	Y	-	-	-	-	-	-	-
LHX4	-	-	Y	-	-	-	-	-
LIFR	Y	-	-	-	-	-	-	-
LIMD1	-	-	Y	-	-	-	-	-
LIN9	-	-	Y	-	-	-	-	-
LITAF	-	-	Y	-	-	-	-	-
LMNA	Y	-	-	-	-	-	-	-
LMO1	Y	-	Y	-	-	-	-	-
LMO2	Y	-	Y	-	-	-	-	-
LPP	Y	-	-	-	-	-	-	-
LRIG3	Y	-	-	-	-	-	-	-
LRP1B	-	-	-	-	-	-	Y	-
LRP2	-	-	-	-	-	-	Y	-
LSM1	-	Y	-	-	-	-	-	-
LSM14A	Y	-	-	-	-	-	-	-
LYL1	Y	-	Y	-	-	-	-	-
LYN	-	-	Y	-	-	-	-	-
LZTS1	-	-	Y	-	-	-	-	-
MAF	Y	-	Y	-	-	-	-	-
MAFA	-	-	Y	-	-	-	-	-
MAFB	Y	-	Y	-	-	-	-	-
MALAT1	Y	-	-	-	-	-	-	-
MALT1	Y	-	-	-	-	-	-	-
MAML2	Y	-	-	-	-	-	-	-
MAP2K1	Y	-	-	-	-	-	-	-
MAP2K2	Y	-	-	-	-	-	-	-
MAP2K4	Y	-	-	-	-	-	-	-
MAP3K1	Y	-	-	-	-	-	-	-
MAP3K13	Y	-	-	-	-	-	-	-
MAP3K5	-	Y	-	-	-	-	-	-
MAP3K8	-	-	Y	-	-	-	-	-
MAPKAPK5	-	-	Y	-	-	-	-	-
MAS1	-	-	Y	-	-	-	-	-
MAX	Y	-	-	-	-	-	-	-
MCC	-	-	Y	-	-	-	-	-
MCF2	-	-	Y	-	-	-	-	-
MCF2L	-	-	Y	-	-	-	-	-
MCTS1	-	-	Y	-	-	-	-	-
MDM2	Y	Y	Y	-	-	-	-	-
MDM4	Y	Y	-	-	-	-	-	-
MDS2	Y	-	Y	-	-	-	-	-
MECOM	Y	-	Y	-	-	-	-	-
MED12	Y	-	-	-	-	-	-	-
MED29	-	Y	-	-	-	-	-	-
MEN1	Y	-	-	-	-	-	-	-
MERTK	-	-	Y	-	-	-	-	-
MET	Y	Y	Y	-	-	-	-	-
MFHAS1	-	-	Y	-	-	-	-	-
MITF	Y	Y	-	-	-	-	-	-
MKL1	Y	-	Y	-	-	-	-	-
MLF1	Y	-	-	-	-	-	-	-
MLH1	Y	-	Y	-	-	-	-	-
MLLT1	Y	-	Y	-	-	-	-	-
MLLT10	Y	-	Y	-	-	-	-	-
MLLT11	Y	-	Y	-	-	-	-	-
MLLT3	Y	-	Y	-	-	-	-	-
MLLT4	Y	-	Y	-	-	-	-	-
MLLT6	Y	-	Y	-	-	-	-	-
MN1	Y	-	Y	-	-	-	-	-
MNX1	Y	-	-	-	-	-	-	-
MOS	-	-	Y	-	-	-	-	-
MPL	Y	-	-	-	-	-	-	-
MSH2	Y	-	Y	-	-	-	-	-
MSH6	Y	-	-	-	-	-	-	-
MSI2	Y	-	-	-	-	-	-	-
MSN	Y	-	-	-	-	-	-	-
MTCP1	Y	-	Y	-	-	-	-	-
MTDH	-	Y	-	-	-	-	-	-
MTSS1	-	-	Y	-	-	-	-	-
MTUS1	-	-	Y	-	-	-	-	-
MUC1	Y	-	Y	-	-	-	-	-
MUC16	-	-	-	-	-	-	Y	-
MUC4	-	-	-	-	-	-	Y	-
MUTYH	Y	-	Y	-	-	-	-	-
MXI1	-	-	Y	-	-	-	-	-
MYB	Y	-	Y	-	-	-	-	-
MYC	Y	Y	Y	-	-	-	-	-
MYCL	Y	-	-	-	-	-	-	-
MYCL1	-	Y	-	-	-	-	-	-
MYCN	Y	Y	Y	-	-	-	-	-
MYD88	Y	-	-	-	-	-	-	-
MYEOV	-	-	Y	-	-	-	-	-
MYH11	Y	-	Y	-	-	-	-	-
MYH9	Y	-	-	-	-	-	-	-
MYO10	-	-	-	-	-	-	-	Y
MYO15A	-	-	-	-	-	-	-	Y
MYO15B	-	-	-	-	-	-	-	Y
MYO16	-	-	-	-	-	-	-	Y
MYO18A	-	-	-	-	-	-	-	Y
MYO18B	-	-	-	-	-	-	-	Y
MYO19	-	-	-	-	-	-	-	Y
MYO1A	-	-	-	-	-	-	-	Y
MYO1B	-	-	-	-	-	-	-	Y
MYO1C	-	-	-	-	-	-	-	Y
MYO1D	-	-	-	-	-	-	-	Y
MYO1E	-	-	-	-	-	-	-	Y
MYO1F	-	-	-	-	-	-	-	Y
MYO1G	-	-	-	-	-	-	-	Y
MYO1H	-	-	-	-	-	-	-	Y
MYO3A	-	-	-	-	-	-	-	Y
MYO3B	-	-	-	-	-	-	-	Y
MYO5B	-	-	-	-	-	-	-	Y
MYO5BP1	-	-	-	-	-	-	-	Y
MYO5BP2	-	-	-	-	-	-	-	Y
MYO5BP3	-	-	-	-	-	-	-	Y
MYO5C	-	-	-	-	-	-	-	Y
MYO6	-	-	-	-	-	-	-	Y
MYO7A	-	-	-	-	-	-	-	Y
MYO7B	-	-	-	-	-	-	-	Y
MYO9A	-	-	-	-	-	-	-	Y
MYO9B	-	-	-	-	-	-	-	Y
MYOC	-	-	-	-	-	-	-	Y
MYOCD	-	-	-	-	-	-	-	Y
MYOF	-	-	-	-	-	-	-	Y
MYOG	-	-	-	-	-	-	-	Y
MYOM1	-	-	-	-	-	-	-	Y
MYOM2	-	-	-	-	-	-	-	Y
MYOM3	-	-	-	-	-	-	-	Y
MYOT	-	-	-	-	-	-	-	Y
MYOZ1	-	-	-	-	-	-	-	Y
MYOZ2	-	-	-	-	-	-	-	Y
MYOZ3	-	-	-	-	-	-	-	Y
NAB2	Y	-	-	-	-	-	-	-
NACA	Y	-	-	-	-	-	-	-
NAT6	-	-	Y	-	-	-	-	-
NBL1	-	-	Y	-	-	-	-	-
NBN	Y	-	-	-	-	-	-	-
NCKIPSD	Y	-	Y	-	-	-	-	-
NCOA1	Y	-	Y	-	-	-	-	-
NCOA2	Y	-	-	-	-	-	-	-
NCOA3	-	Y	-	-	-	-	-	-
NCOA4	Y	-	Y	-	-	-	-	-
NCOR1	Y	-	-	-	-	-	-	-
NDRG1	Y	-	-	-	-	-	-	-
NDRG2	-	-	Y	-	-	-	-	-
NEB	-	-	-	-	-	-	-	Y
NEB	-	-	-	-	-	-	Y	-
NEBL	-	-	-	-	-	-	-	Y
NET1	-	-	Y	-	-	-	-	-
NEURL1	-	-	Y	-	-	-	-	-
NF1	Y	-	Y	-	-	-	-	-
NF2	Y	-	Y	-	-	-	-	-
NFATC2	Y	-	-	-	-	-	-	-
NFE2L2	Y	-	-	-	-	-	-	-
NFIB	Y	-	-	-	-	-	-	-
NFKB2	Y	-	Y	-	-	-	-	-
NFKBIE	Y	-	-	-	-	-	-	-
NIN	Y	-	-	-	-	-	-	-
NKX2-1	Y	Y	-	-	-	-	-	-
NKX2-8	-	Y	-	-	-	-	-	-
NKX3-1	-	-	Y	-	-	-	-	-
NONO	Y	-	-	-	-	-	-	-
NOTCH1	Y	-	-	-	-	-	-	-
NOTCH2	Y	-	-	-	-	-	-	-
NPM1	Y	-	Y	-	-	-	-	-
NPRL2	-	-	Y	-	-	-	-	-
NR4A3	Y	-	Y	-	-	-	-	-
NRAS	Y	-	Y	-	-	-	-	-
NRG1	Y	-	-	-	-	-	-	-
NSD1	Y	-	Y	-	-	-	-	-
NT5C2	Y	-	-	-	-	-	-	-
NTRK1	Y	-	Y	-	-	-	-	-
NTRK3	Y	-	-	-	-	-	-	-
NUMA1	Y	-	-	-	-	-	-	-
NUP214	Y	-	Y	-	-	-	-	-
NUP98	Y	-	-	-	-	-	-	-
NUTM1	Y	-	-	-	-	-	-	-
NUTM2A	Y	-	-	-	-	-	-	-
NUTM2B	Y	-	-	-	-	-	-	-
OBSCN	-	-	-	-	-	-	-	Y
OBSCN	-	-	-	-	-	-	Y	-
OLIG2	Y	-	Y	-	-	-	-	-
OMD	Y	-	-	-	-	-	-	-
OR10AG1	-	-	-	-	-	-	Y	-
OR10G7	-	-	-	-	-	-	Y	-
OR10G9	-	-	-	-	-	-	Y	-
OR10R2	-	-	-	-	-	-	Y	-
OR11L1	-	-	-	-	-	-	Y	-
OR1J2	-	-	-	-	-	-	Y	-
OR1L8	-	-	-	-	-	-	Y	-
OR1M1	-	-	-	-	-	-	Y	-
OR2A2	-	-	-	-	-	-	Y	-
OR2A42	-	-	-	-	-	-	Y	-
OR2L13	-	-	-	-	-	-	Y	-
OR2M4	-	-	-	-	-	-	Y	-
OR2T11	-	-	-	-	-	-	Y	-
OR2T33	-	-	-	-	-	-	Y	-
OR2T34	-	-	-	-	-	-	Y	-
OR4C13	-	-	-	-	-	-	Y	-
OR4C15	-	-	-	-	-	-	Y	-
OR4C46	-	-	-	-	-	-	Y	-
OR4C6	-	-	-	-	-	-	Y	-
OR4D11	-	-	-	-	-	-	Y	-
OR4K1	-	-	-	-	-	-	Y	-
OR4K14	-	-	-	-	-	-	Y	-
OR4L1	-	-	-	-	-	-	Y	-
OR4N5	-	-	-	-	-	-	Y	-
OR4Q3	-	-	-	-	-	-	Y	-
OR4S2	-	-	-	-	-	-	Y	-
OR51E1	-	-	-	-	-	-	Y	-
OR51I2	-	-	-	-	-	-	Y	-
OR52A5	-	-	-	-	-	-	Y	-
OR52E8	-	-	-	-	-	-	Y	-
OR5B17	-	-	-	-	-	-	Y	-
OR5H2	-	-	-	-	-	-	Y	-
OR5L1	-	-	-	-	-	-	Y	-
OR5L2	-	-	-	-	-	-	Y	-
OR5M5P	-	-	-	-	-	-	Y	-
OR6A2	-	-	-	-	-	-	Y	-
OR6K3	-	-	-	-	-	-	Y	-
OR8H2	-	-	-	-	-	-	Y	-
OR8K1	-	-	-	-	-	-	Y	-
P2RY8	Y	-	-	-	-	-	-	-
PAF1	-	-	Y	-	-	-	-	-
PAFAH1B2	Y	-	-	-	-	-	-	-
PAK1	-	Y	-	-	-	-	-	-
PALB2	Y	-	Y	-	-	-	-	-
PANO1	-	-	Y	-	-	-	-	-
PARK7	-	-	Y	-	-	-	-	-
PATZ1	-	-	Y	-	-	-	-	-
PAX3	Y	-	Y	-	-	-	-	-
PAX5	Y	-	Y	-	-	-	-	-
PAX7	Y	-	Y	-	-	-	-	-
PAX8	Y	-	-	-	-	-	-	-
PAX9	-	Y	-	-	-	-	-	-
PBRM1	Y	-	Y	-	-	-	-	-
PBX1	Y	-	Y	-	-	-	-	-
PCLO	-	-	-	-	-	-	Y	-
PCM1	Y	-	Y	-	-	-	-	-
PCSK7	Y	-	-	-	-	-	-	-
PDCD1LG2	Y	-	-	-	-	-	-	-
PDCD4	-	-	Y	-	-	-	-	-
PDE4DIP	Y	-	-	-	-	-	-	-
PDGFB	Y	-	Y	-	-	-	-	-
PDGFD	-	-	Y	-	-	-	-	-
PDGFRA	Y	-	Y	-	-	-	-	-
PDGFRB	Y	-	Y	-	-	-	-	-
PER1	Y	-	-	-	-	-	-	-
PHB	-	-	Y	-	-	-	-	-
PHF6	Y	-	-	-	-	-	-	-
PHLDA3	-	-	Y	-	-	-	-	-
PHLPP1	-	-	Y	-	-	-	-	-
PHLPP2	-	-	Y	-	-	-	-	-
PHOX2B	Y	-	-	-	-	-	-	-
PICALM	Y	-	Y	-	-	-	-	-
PIK3CA	Y	Y	Y	-	-	-	-	-
PIK3R1	Y	-	-	-	-	-	-	-
PIM1	Y	-	Y	-	-	-	-	-
PIM2	-	-	Y	-	-	-	-	-
PIM3	-	-	Y	-	-	-	-	-
PINX1	-	-	Y	-	-	-	-	-
PLA2G10	-	Y	-	-	-	-	-	-
PLAG1	Y	-	Y	-	-	-	-	-
PLCG1	Y	-	-	-	-	-	-	-
PLEC	-	-	-	-	-	-	-	Y
PLEKHG2	-	-	Y	-	-	-	-	-
PLEKHO1	-	-	Y	-	-	-	-	-
PLK2	-	-	Y	-	-	-	-	-
PML	Y	-	Y	-	-	-	-	-
PMS1	Y	-	Y	-	-	-	-	-
PMS2	Y	-	Y	-	-	-	-	-
PNN	-	-	Y	-	-	-	-	-
POLE	Y	-	-	-	-	-	-	-
POT1	Y	-	-	-	-	-	-	-
POU2AF1	Y	-	Y	-	-	-	-	-
POU5F1	Y	-	-	-	-	-	-	-
PPAPDC1B	-	-	Y	-	-	-	-	-
PPARG	Y	-	-	-	-	-	-	-
PPFIBP1	Y	-	-	-	-	-	-	-
PPM1D	-	Y	-	-	-	-	-	-
PPP2R1A	Y	-	-	-	-	-	-	-
PPP6C	Y	-	-	-	-	-	-	-
PRCC	Y	-	Y	-	-	-	-	-
PRDM1	Y	-	-	-	-	-	-	-
PRDM16	Y	-	-	-	-	-	-	-
PRF1	Y	-	-	-	-	-	-	-
PRKAR1A	Y	-	-	-	-	-	-	-
PRKCA	-	-	Y	-	-	-	-	-
PRKCD	-	-	Y	-	-	-	-	-
PRKCDBP	-	-	Y	-	-	-	-	-
PRKCI	-	Y	Y	-	-	-	-	-
PRR5	-	-	Y	-	-	-	-	-
PRRX1	Y	-	-	-	-	-	-	-
PSIP1	Y	-	-	-	-	-	-	-
PTCH1	Y	-	Y	-	-	-	-	-
PTEN	Y	-	Y	-	-	-	-	-
PTK6	-	Y	-	-	-	-	-	-
PTPN11	Y	-	-	-	-	-	-	-
PTPRB	Y	-	-	-	-	-	-	-
PTPRC	Y	-	-	-	-	-	-	-
PTPRK	Y	-	-	-	-	-	-	-
PTTG1	-	-	Y	-	-	-	-	-
PTTG2	-	-	Y	-	-	-	-	-
PTTG3P	-	-	Y	-	-	-	-	-
PWWP2A	Y	-	-	-	-	-	-	-
PYCARD	-	-	Y	-	-	-	-	-
PYHIN1	-	-	Y	-	-	-	-	-
RAB23	-	Y	-	-	-	-	-	-
RAB25	-	Y	-	-	-	-	-	-
RAB8A	-	-	Y	-	-	-	-	-
RABEP1	Y	-	-	-	-	-	-	-
RAC1	Y	-	-	-	-	-	-	-
RAD21	Y	-	-	-	-	-	-	-
RAD51B	Y	-	-	-	-	-	-	-
RAF1	Y	-	Y	-	-	-	-	-
RALGDS	Y	-	-	-	-	-	-	-
RANBP17	Y	-	-	-	-	-	-	-
RANBP2	Y	-	-	-	-	-	-	-
RAP1A	-	-	Y	-	-	-	-	-
RAP1GDS1	Y	-	-	-	-	-	-	-
RARA	Y	-	Y	-	-	-	-	-
RARB	-	-	Y	-	-	-	-	-
RASA1	-	-	Y	-	-	-	-	-
RASL10A	-	-	Y	-	-	-	-	-
RASSF1	-	-	Y	-	-	-	-	-
RASSF2	-	-	Y	-	-	-	-	-
RASSF4	-	-	Y	-	-	-	-	-
RASSF5	-	-	Y	-	-	-	-	-
RB1	Y	-	Y	-	-	-	-	-
RB1CC1	-	-	Y	-	-	-	-	-
RBL1	-	-	Y	-	-	-	-	-
RBL2	-	-	Y	-	-	-	-	-
RBM15	Y	-	Y	-	-	-	-	-
RBMX	-	-	Y	-	-	-	-	-
RECK	-	-	Y	-	-	-	-	-
RECQL4	Y	-	-	-	-	-	-	-
REL	Y	Y	Y	-	-	-	-	-
RET	Y	-	Y	-	-	-	-	-
RHOA	Y	-	Y	-	-	-	-	-
RHOB	-	-	Y	-	-	-	-	-
RHOH	Y	-	-	-	-	-	-	-
RMI2	Y	-	-	-	-	-	-	-
RNF213	Y	-	Y	-	-	-	-	-
RNF217-AS1	Y	-	-	-	-	-	-	-
RNF43	Y	-	-	-	-	-	-	-
ROS1	Y	-	Y	-	-	-	-	-
RPL10	Y	-	-	-	-	-	-	-
RPL22	Y	-	-	-	-	-	-	-
RPL5	Y	-	-	-	-	-	-	-
RPN1	Y	-	-	-	-	-	-	-
RPS6KA2	-	-	Y	-	-	-	-	-
RPS6KB1	-	Y	-	-	-	-	-	-
RRAS2	-	-	Y	-	-	-	-	-
RSPO2	Y	-	-	-	-	-	-	-
RSPO3	Y	-	-	-	-	-	-	-
RUNDC2A	Y	-	-	-	-	-	-	-
RUNX1	Y	-	Y	-	-	-	-	-
RUNX1T1	Y	-	Y	-	-	-	-	-
RUVBL1	-	Y	-	-	-	-	-	-
RYR2	-	-	-	-	-	-	Y	-
RYR3	-	-	-	-	-	-	Y	-
SALL4	-	-	Y	-	-	-	-	-
SASH1	-	-	Y	-	-	-	-	-
SBDS	Y	-	-	-	-	-	-	-
SDC4	Y	-	-	-	-	-	-	-
SDHA	-	-	Y	-	-	-	-	-
SDHAF2	Y	-	-	-	-	-	-	-
SDHB	Y	-	-	-	-	-	-	-
SDHC	Y	-	-	-	-	-	-	-
SDHD	Y	-	-	-	-	-	-	-
SEC31A	-	-	Y	-	-	-	-	-
2005-09-01	Y	-	-	-	-	-	-	-
2006-09-01	Y	-	-	-	-	-	-	-
2009-09-01	Y	-	-	-	-	-	-	-
SET	Y	-	Y	-	-	-	-	-
SETBP1	Y	-	-	-	-	-	-	-
SETD2	Y	-	-	-	-	-	-	-
SF3B1	Y	-	-	-	-	-	-	-
SFPQ	Y	-	-	-	-	-	-	-
SH2B3	Y	-	-	-	-	-	-	-
SH3GL1	Y	-	Y	-	-	-	-	-
SHC1	-	Y	-	-	-	-	-	-
SHH	-	Y	-	-	-	-	-	-
SIK1	-	-	Y	-	-	-	-	-
SIRT4	-	-	Y	-	-	-	-	-
SKI	-	-	Y	-	-	-	-	-
SKP2	-	Y	-	-	-	-	-	-
SLC34A2	Y	-	-	-	-	-	-	-
SLC45A3	Y	-	-	-	-	-	-	-
SLC5A8	-	-	Y	-	-	-	-	-
SMAD4	Y	-	-	-	-	-	-	-
SMARCA4	Y	-	-	-	-	-	-	-
SMARCB1	Y	-	Y	-	-	-	-	-
SMARCD1	Y	-	-	-	-	-	-	-
SMARCE1	Y	-	-	-	-	-	-	-
SMO	Y	-	-	-	-	-	-	-
SMURF1	-	Y	-	-	-	-	-	-
SND1	Y	-	-	-	-	-	-	-
SOCS1	Y	-	-	-	-	-	-	-
SOX2	Y	-	-	-	-	-	-	-
SPECC1	Y	-	Y	-	-	-	-	-
SPEN	Y	-	-	-	-	-	-	-
SPI1	-	-	Y	-	-	-	-	-
SPOP	Y	-	-	-	-	-	-	-
SRC	-	-	Y	-	-	-	-	-
SRGAP3	Y	-	-	-	-	-	-	-
SRSF2	Y	-	-	-	-	-	-	-
SRSF3	Y	-	-	-	-	-	-	-
SS18	Y	-	Y	-	-	-	-	-
SS18L1	Y	-	-	-	-	-	-	-
SSX1	Y	-	Y	-	-	-	-	-
SSX2	Y	-	Y	-	-	-	-	-
SSX4	Y	-	-	-	-	-	-	-
ST20	-	-	Y	-	-	-	-	-
STAG2	Y	-	-	-	-	-	-	-
STARD13	-	-	Y	-	-	-	-	-
STARD3	-	Y	-	-	-	-	-	-
STAT3	Y	-	-	-	-	-	-	-
STAT5B	Y	-	-	-	-	-	-	-
STAT6	Y	-	-	-	-	-	-	-
STIL	Y	-	Y	-	-	-	-	-
STK11	Y	-	Y	-	-	-	-	-
STRN	Y	-	-	-	-	-	-	-
STYK1	-	-	Y	-	-	-	-	-
SUFU	Y	-	Y	-	-	-	-	-
SUSD2	-	-	Y	-	-	-	-	-
SUSD6	-	-	Y	-	-	-	-	-
SUZ12	Y	-	Y	-	-	-	-	-
SYK	Y	-	-	-	-	-	-	-
SYNE1	-	-	-	-	-	-	Y	-
SYNE2	-	-	-	-	-	-	Y	-
TAF15	Y	-	Y	-	-	-	-	-
TAL1	Y	-	Y	-	-	-	-	-
TAL2	Y	-	Y	-	-	-	-	-
TBC1D3	-	-	Y	-	-	-	-	-
TBL1XR1	Y	-	-	-	-	-	-	-
TBRG1	-	-	Y	-	-	-	-	-
TBX3	Y	-	-	-	-	-	-	-
TCEA1	Y	-	-	-	-	-	-	-
TCF12	Y	-	-	-	-	-	-	-
TCF3	Y	-	Y	-	-	-	-	-
TCF7L2	Y	-	-	-	-	-	-	-
TCHP	-	-	Y	-	-	-	-	-
TCL1A	Y	-	Y	-	-	-	-	-
TCL1B	-	-	Y	-	-	-	-	-
TCL6	Y	-	-	-	-	-	-	-
TCP10L	-	-	Y	-	-	-	-	-
TCTA	-	-	Y	-	-	-	-	-
TERT	Y	-	-	-	-	-	-	-
TET1	Y	-	-	-	-	-	-	-
TET2	Y	-	Y	-	-	-	-	-
TFE3	Y	-	Y	-	-	-	-	-
TFEB	Y	-	-	-	-	-	-	-
TFG	Y	-	Y	-	-	-	-	-
TFPT	Y	-	Y	-	-	-	-	-
TFRC	Y	-	-	-	-	-	-	-
THRAP3	Y	-	-	-	-	-	-	-
TLX1	Y	-	Y	-	-	-	-	-
TLX3	Y	-	-	-	-	-	-	-
TMEM127	-	-	Y	-	-	-	-	-
TMPRSS2	Y	-	-	-	-	-	-	-
TNFAIP3	Y	-	-	-	-	-	-	-
TNFRSF14	Y	-	-	-	-	-	-	-
TNFRSF17	Y	-	Y	-	-	-	-	-
TOP1	Y	-	Y	-	-	-	-	-
TP53	Y	-	Y	-	-	-	-	-
TP53INP1	-	-	Y	-	-	-	-	-
TP63	-	-	Y	-	-	-	-	-
TP73	-	-	Y	-	-	-	-	-
TPM1	-	-	-	-	-	-	-	Y
TPM3	Y	-	Y	-	-	-	-	-
TPM4	Y	-	-	-	-	-	-	-
TPR	Y	-	Y	-	-	-	-	-
TRA	Y	-	-	-	-	-	-	-
TRAF7	Y	-	-	-	-	-	-	-
TRB	Y	-	-	-	-	-	-	-
TRD	Y	-	-	-	-	-	-	-
TRIB1	-	Y	-	-	-	-	-	-
TRIM24	Y	-	Y	-	-	-	-	-
TRIM27	Y	-	Y	-	-	-	-	-
TRIM33	Y	-	-	-	-	-	-	-
TRIM37	-	-	Y	-	-	-	-	-
TRIP11	Y	-	-	-	-	-	-	-
TRRAP	Y	-	-	-	-	-	-	-
TSC1	Y	-	Y	-	-	-	-	-
TSC2	Y	-	Y	-	-	-	-	-
TSHR	Y	-	-	-	-	-	-	-
TTL	Y	-	-	-	-	-	-	-
TTN	-	-	-	-	-	-	Y	Y
TUB	-	-	-	-	-	-	-	Y
TUBA1A	-	-	-	-	-	-	-	Y
TUBA1B	-	-	-	-	-	-	-	Y
TUBA1C	-	-	-	-	-	-	-	Y
TUBA3C	-	-	-	-	-	-	-	Y
TUBA3D	-	-	-	-	-	-	-	Y
TUBA3E	-	-	-	-	-	-	-	Y
TUBA3FP	-	-	-	-	-	-	-	Y
TUBA3GP	-	-	-	-	-	-	-	Y
TUBA4A	-	-	-	-	-	-	-	Y
TUBA4B	-	-	-	-	-	-	-	Y
TUBA8	-	-	-	-	-	-	-	Y
TUBAL3	-	-	-	-	-	-	-	Y
TUBAP	-	-	-	-	-	-	-	Y
TUBB	-	-	-	-	-	-	-	Y
TUBB1	-	-	-	-	-	-	-	Y
TUBB2A	-	-	-	-	-	-	-	Y
TUBB2B	-	-	-	-	-	-	-	Y
TUBB3	-	-	-	-	-	-	-	Y
TUBB4A	-	-	-	-	-	-	-	Y
TUBB4B	-	-	-	-	-	-	-	Y
TUBB6	-	-	-	-	-	-	-	Y
TUBB8	-	-	-	-	-	-	-	Y
TUBBP1	-	-	-	-	-	-	-	Y
TUBBP2	-	-	-	-	-	-	-	Y
TUBD1	-	-	-	-	-	-	-	Y
TUBE1	-	-	-	-	-	-	-	Y
TUBG1	-	-	-	-	-	-	-	Y
TUBG2	-	-	-	-	-	-	-	Y
TUSC2	-	-	Y	-	-	-	-	-
TXNIP	-	-	Y	-	-	-	-	-
U2AF1	Y	-	-	-	-	-	-	-
UBR5	Y	-	-	-	-	-	-	-
UFL1	-	-	Y	-	-	-	-	-
URI1	-	-	Y	-	-	-	-	-
USP4	-	-	Y	-	-	-	-	-
USP6	Y	-	Y	-	-	-	-	-
VAV1	-	-	Y	-	-	-	-	-
VHL	Y	-	Y	-	-	-	-	-
VTI1A	Y	-	-	-	-	-	-	-
VWA5A	-	-	Y	-	-	-	-	-
WAS	Y	-	-	-	-	-	-	-
WDR11	-	-	Y	-	-	-	-	-
WHSC1	Y	-	Y	-	-	-	-	-
WHSC1L1	Y	Y	Y	-	-	-	-	-
WIF1	Y	-	-	-	-	-	-	-
WISP1	-	-	Y	-	-	-	-	-
WNT1	-	-	Y	-	-	-	-	-
WNT3	-	-	Y	-	-	-	-	-
WRN	Y	-	-	-	-	-	-	-
WT1	Y	-	Y	-	-	-	-	-
WWOX	-	-	Y	-	-	-	-	-
WWTR1	Y	-	Y	-	-	-	-	-
XAF1	-	-	Y	-	-	-	-	-
XBP1	-	-	Y	-	-	-	-	-
XPA	Y	-	-	-	-	-	-	-
XPC	Y	-	-	-	-	-	-	-
XPO1	Y	-	-	-	-	-	-	-
XRN1	-	-	Y	-	-	-	-	-
YAP1	-	Y	Y	-	-	-	-	-
YEATS4	-	Y	-	-	-	-	-	-
YES1	-	-	Y	-	-	-	-	-
YWHAB	-	Y	-	-	-	-	-	-
YWHAE	Y	-	-	-	-	-	-	-
YWHAQ	-	Y	-	-	-	-	-	-
YWHAZ	-	Y	-	-	-	-	-	-
ZBTB16	Y	-	Y	-	-	-	-	-
ZBTB7C	-	-	Y	-	-	-	-	-
ZCCHC8	Y	-	-	-	-	-	-	-
ZDHHC17	-	-	Y	-	-	-	-	-
ZFYVE19	-	-	Y	-	-	-	-	-
ZMYND11	-	-	Y	-	-	-	-	-
ZNF198	Y	-	-	-	-	-	-	-
ZNF217	-	Y	-	-	-	-	-	-
ZNF278	Y	-	-	-	-	-	-	-
ZNF320	-	-	Y	-	-	-	-	-
ZNF331	Y	-	-	-	-	-	-	-
ZNF384	Y	-	-	-	-	-	-	-
ZNF521	Y	-	Y	-	-	-	-	-
ZNF639	-	Y	-	-	-	-	-	-
ZRSR2	Y	-	-	-	-	-	-	-
