# Supplementary material for: ConsensusDriver Improves upon Individual Algorithms for Predicting Driver Alterations in Different Cancer Types and Individual Patients
Source: Oxford University Press journal article supplement (doi:10.1158/0008-5472.can-17-1345), 2017-12-19
Supplement: 00085472can171345-sup-182915_3_supp_4332788_nxw6v8.xlsx [file 00085472can171345-sup-182915_3_supp_4332788_nxw6v8.xlsx]

## Sheet: supplemetary_table_2
Gene	Level of evidence	Ressource		Level of evidence
ABL1	1	InTOgen		1	Standard of care
ALK	1	InTOgen		2	Investigational target
APC	1	InTOgen		3	Research target
BRAF	1	OncoKB,InTOgen
BRCA1	1	OncoKB
BRCA2	1	OncoKB
CDK4	1	OncoKB
EGFR	1	OncoKB,InTOgen
EPHA1	1	InTOgen
EPHA4	1	InTOgen
EPHB2	1	InTOgen
ERBB2	1	OncoKB,InTOgen
ERBB3	1	InTOgen
FGFR1	1	InTOgen
FGFR2	1	InTOgen
FGFR3	1	InTOgen
FLT3	1	InTOgen
GNA11	1	InTOgen
HDAC9	1	InTOgen
HGF	1	InTOgen
HRAS	1	InTOgen
KDR	1	InTOgen
KIT	1	OncoKB,InTOgen
MAP2K1	1	InTOgen
MET	1	OncoKB,InTOgen
MLL	1	InTOgen
MTOR	1	InTOgen
MYD88	1	InTOgen
NF1	1	InTOgen
NF2	1	InTOgen
PDGFRA	1	OncoKB
PGR	1	InTOgen
PTEN	1	InTOgen
RAF1	1	InTOgen
RET	1	InTOgen
ROS1	1	InTOgen
SMO	1	InTOgen
TSC1	1	OncoKB,InTOgen
TSC2	1	OncoKB
AKT1	2	OncoKB,InTOgen
AKT3	2	InTOgen
ARAF	2	OncoKB
ATR	2	InTOgen
CCND1	2	InTOgen
CCND2	2	InTOgen
CCND3	2	InTOgen
CCNE1	2	InTOgen
CDK6	2	InTOgen
CDKN2A	2	InTOgen
ERCC2	2	OncoKB
FUS	2	InTOgen
IDH1	2	OncoKB,InTOgen
IDH2	2	OncoKB,InTOgen
KRAS	2	InTOgen
MDM2	2	InTOgen
MMP2	2	InTOgen
NOTCH1	2	InTOgen
NOTCH2	2	InTOgen
NRAS	2	OncoKB,InTOgen
PIK3CA	2	OncoKB,InTOgen
PIK3CB	2	InTOgen
PIP5K1A	2	InTOgen
PRKCZ	2	InTOgen
PTCH1	2	OncoKB
ACACA	3	InTOgen
ACAD8	3	InTOgen
ACSL3	3	InTOgen
ADAM10	3	InTOgen
ADCY1	3	InTOgen
AHR	3	InTOgen
ARFGAP1	3	InTOgen
ARFGEF2	3	InTOgen
ARID4A	3	InTOgen
ATF1	3	InTOgen
BLM	3	InTOgen
CAD	3	InTOgen
CAPN7	3	InTOgen
CARM1	3	InTOgen
CAT	3	InTOgen
CLCC1	3	InTOgen
CNTNAP1	3	InTOgen
COL1A1	3	InTOgen
CTNNB1	3	InTOgen
CUX1	3	InTOgen
DHX9	3	InTOgen
DLG1	3	InTOgen
EIF4G3	3	InTOgen
ESR1	3	OncoKB
EZH2	3	OncoKB
F8	3	InTOgen
FAT2	3	InTOgen
FCRL4	3	InTOgen
GNAS	3	InTOgen
GOLGA5	3	InTOgen
ITGA9	3	InTOgen
KALRN	3	InTOgen
LNPEP	3	InTOgen
LPHN2	3	InTOgen
LRP6	3	InTOgen
MACF1	3	InTOgen
MAT2A	3	InTOgen
MDM4	3	InTOgen
MGMT	3	InTOgen
NCK1	3	InTOgen
NDRG1	3	InTOgen
NEDD4L	3	InTOgen
NFE2L2	3	InTOgen
NR2F2	3	InTOgen
NTN4	3	InTOgen
NUP98	3	InTOgen
PAX5	3	InTOgen
PCDH18	3	InTOgen
PCSK5	3	InTOgen
PCSK6	3	InTOgen
PIK3R3	3	InTOgen
PLCB1	3	InTOgen
PLCG1	3	InTOgen
PLXNA1	3	InTOgen
PLXNB2	3	InTOgen
POM121	3	InTOgen
PPP2R1A	3	InTOgen
PPP2R5C	3	InTOgen
PRPF8	3	InTOgen
PSMA6	3	InTOgen
PTPN11	3	InTOgen
PTPRF	3	InTOgen
PTPRU	3	InTOgen
RAC1	3	InTOgen
RHOA	3	InTOgen
RHOT1	3	InTOgen
ROBO2	3	InTOgen
SOS1	3	InTOgen
SPOP	3	InTOgen
STARD13	3	InTOgen
SVEP1	3	InTOgen
TAF1	3	InTOgen
TNPO1	3	InTOgen
TRIO	3	InTOgen
TRIP10	3	InTOgen
USP6	3	InTOgen
WNK1	3	InTOgen
WNT5A	3	InTOgen
XPO1	3	InTOgen
ZNF638	3	InTOgen
ZNF814	3	InTOgen
